# Supplementary material
Source: PubMed Central journal article supplement (PMC2906144)
Supplement: NIHMS211420-supplement-Supplementary_material.pdf [file NIHMS211420-supplement-Supplementary_material.pdf]

## **Supplementary Materials and Methods**

**Immunofluorescence of frozen sections.** Paraformaldehyde-fixed frozen tissue sections from mouse prostate were allowed to dry for 20 minutes at room temperature. Sections were blocked with 10% goat serum plus 2% bovine serum albumin (BSA) for 1 hour then washed in PBS and treated using the avidin/biotin blocking kit (Vector labs) according to manufacturers instructions. Sections were then incubated with the following primary antibodies in 2% BSA overnight at 40 degrees: biotin conjugated anti-CD49f clone GoH3 (Biolegend) and anti-cytokeratin 5 rabbit polyclonal (Covance Research). After extensive washing, primary antibodies were detected using Streptavidin Alexa488 and anti-rabbit Alexa546 respectively (Invitrogen). Sections were washed again before mounting in Vectashield including DAPI (Vector labs). Slides were analyzed on a confocal microscope (Zeiss).

**p27<sup>Kip1</sup> immunofluorescence analysis in MEFs.** Cells were fixed in PFA 4% for 15 minutes and permeabilized in Triton X100 0.1%. p27<sup>Kip1</sup> mouse monoclonal antibody (upstate, 1:200) was used.

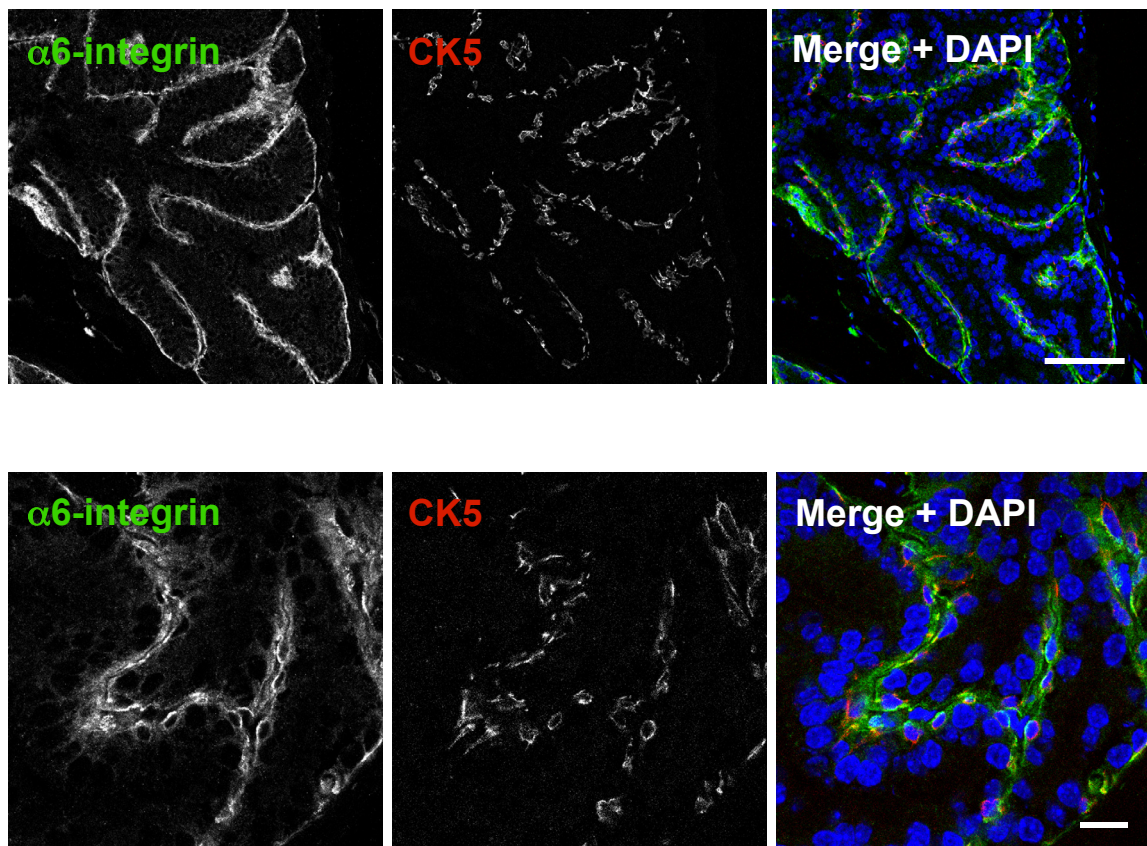

**Supplementary Figure 1.  $\alpha 6$ -integrin is predominantly expressed by cytokeratin 5 (CK5)-positive basal prostatic epithelial cells.** Immunofluorescence images of WT AP sections co-stained for  $\alpha 6$ -integrin and CK5. DAPI nuclear counterstain is shown in blue. Scale bars are 100 $\mu$ m (top panels, lower magnification) and 20 $\mu$ m (lower panels, higher magnification).

**A**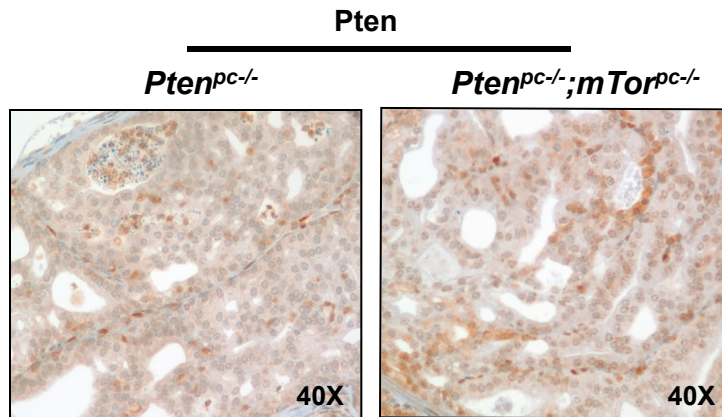**B**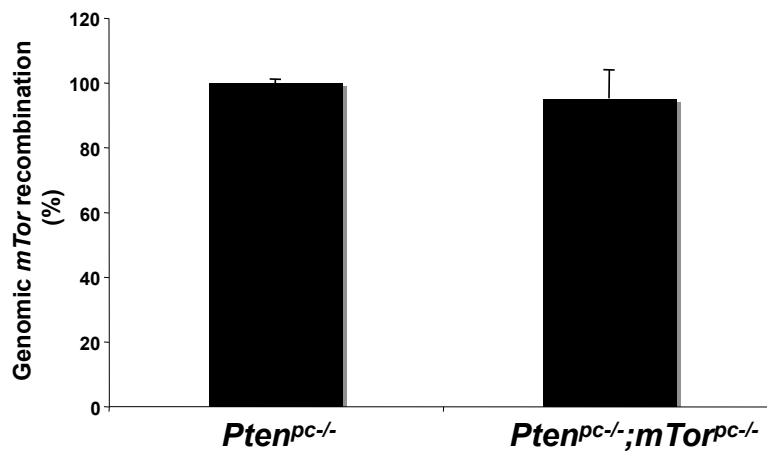

**Supplementary Figure 2. Residual PIN-affected glands in *Pten<sup>pc-/-</sup>;mTor<sup>pc-/-</sup>* mice arise from *Pten*-recombined cells that have escaped *mTor* recombination.**

(A) IHC staining of PIN lesions in the prostate of *Pten<sup>pc-/-</sup>* and *Pten<sup>pc-/-</sup>;mTor<sup>pc-/-</sup>* mice with an antibody directed against Pten. (B) *mTor* genomic quantitative real-time PCR on DNA extracted from laser capture micro-dissected epithelial cells of PIN glands from cryo-sections of *Pten<sup>pc-/-</sup>* and *Pten<sup>pc-/-</sup>;mTor<sup>pc-/-</sup>* mice prostates.

**A**

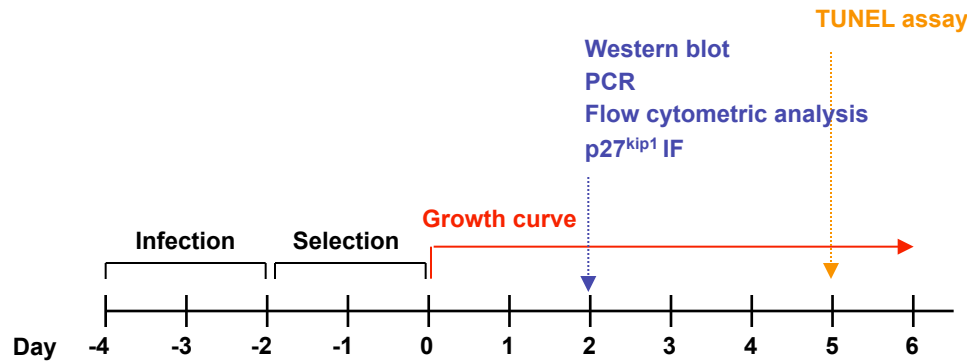

**B**

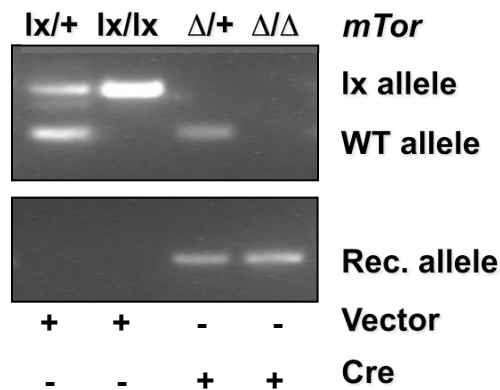

**C**

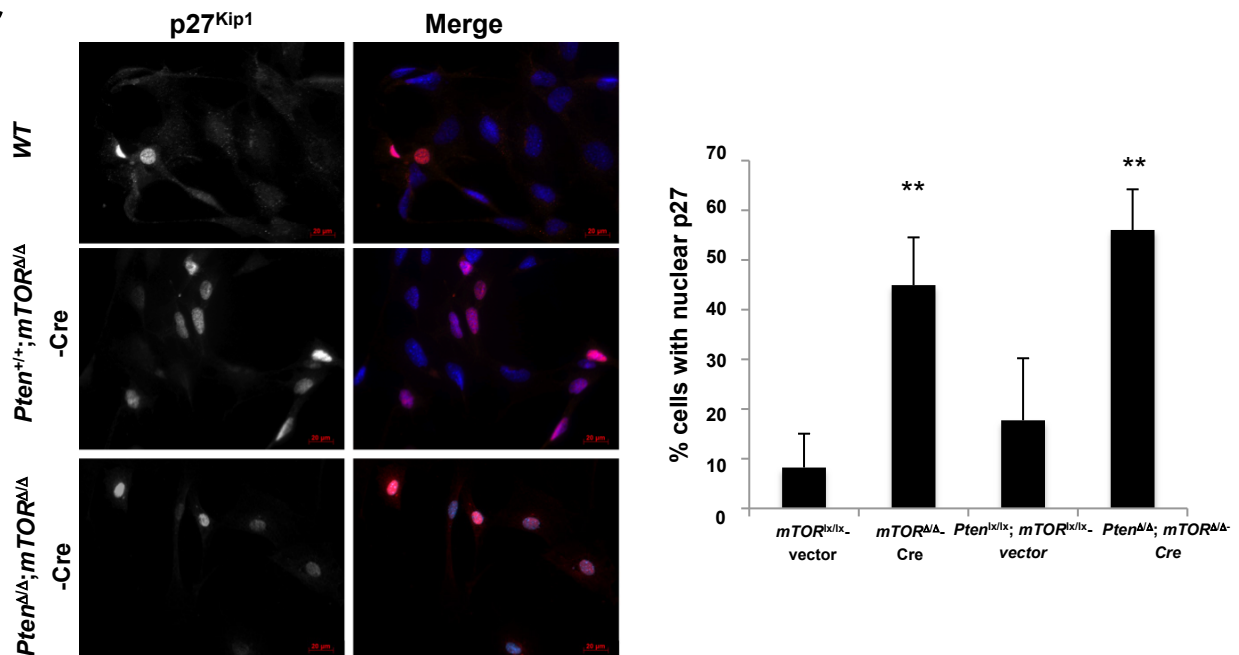

**Supplementary Figure 3. Deletion of *mTor* in MEFs.**

(A) Experimental timeline of infection and analysis of MEFs. (B) Identification of WT, *mTor*<sup>loxP</sup>, and *mTor*<sup>Δ</sup> alleles by PCR in *mTor*<sup>loxP/loxP</sup> and *mTor*<sup>loxP/+</sup> MEFs infected with PURO-IRES-GFP (vector) or Cre-PURO-IRES-GFP (Cre). (C) Left panel: p27 localization in the indicated MEFs by immunofluorescence analysis (IF) (see experimental timeline shown in 3A). Right panel: quantification of the percentage of cells with p27 nuclear localization. \*\*, p<0.01.
